# Supplementary material for: A Role for TGFβ Signaling in Preclinical Osteolytic Estrogen Receptor-Positive Breast Cancer Bone Metastases Progression
Source: Int J Mol Sci. 2021 Apr 24;22(9):4463. doi: 10.3390/ijms22094463 (PMC8123146; doi:10.3390/ijms22094463)
Supplement: Supplementary file 1 [file ijms-22-04463-s001.zip › ijms-1170993-supplementary.pdf]

## SUPPLEMENTAL TABLES AND FIGURES

**Supplemental Table S1.** Primary antibodies used for Western blots.

| Antigen               | Manufacturer                    | Catalog #         |
|-----------------------|---------------------------------|-------------------|
| ER $\alpha$           | Cell Signaling Technology (CST) | 8644              |
| pER $\alpha$ S104/106 | Abcam                           | ab75753           |
| pER $\alpha$ S118     | Abcam                           | ab32396           |
| TGF $\beta$ RI        | CST                             | 3712              |
| TGF $\beta$ RII       | CST                             | 3713 <sup>1</sup> |
| TGF $\beta$ RII       | CST                             | 79424             |
| pSMAD2                | CST                             | 3108              |
| SMAD2                 | CST                             | 5339              |
| pSMAD3                | CST                             | 9520              |
| SMAD3                 | CST                             | 9523              |
| SMAD4                 | CST                             | 38454             |
| pp38                  | CST                             | 4511              |
| p38                   | CST                             | 8690              |
| pERK1/2               | CST                             | 4370              |
| ERK1/2                | CST                             | 4695              |
| pJNK1/2               | CST                             | 4668              |
| JNK1/2                | CST                             | 9252              |
| pmTOR S2481           | CST                             | 2974              |
| pmTOR S2448           | CST                             | 2971              |
| mTOR                  | CST                             | 2972              |
| E-cadherin            | Abcam                           | ab15148           |
| Vimentin              | CST                             | 5741              |
| $\beta$ -actin        | CST                             | 4967              |

<sup>1</sup>This antibody was used in Figure S1A.

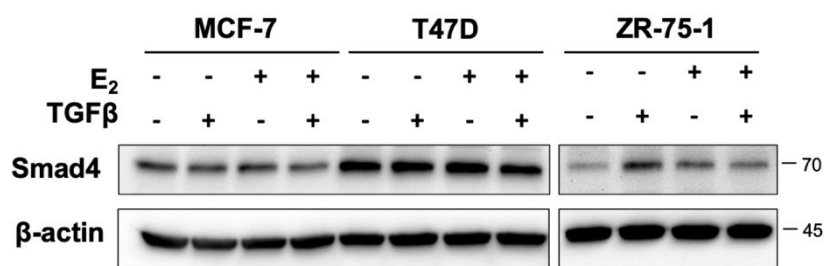

**Supplemental Figure S1. Expression of Smad4 in ER+ breast cancer cells.**

Smad4 expression in MCF-7, T47D, and ZR-75-1 maintained in E<sub>2</sub>-deplete media for four days prior to E<sub>2</sub> (10<sup>-8</sup>M) stimulation (23 hours), followed by 1 hour of TGFβ (5 ng/ml).

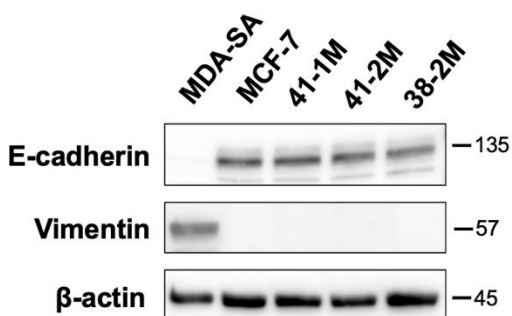

**Supplemental Figure S2. ER+ BMET-derived cells maintain parental phenotype.**

E-cadherin vs. vimentin expression in ER+ MCF-7, T47D, ZR-75-1, and/or MCF-7 BMET-derived cells (38-2M, 41-1M, 41-2M and/or 43-4M), as compared to ER- MDA-SA cells by Western blot analysis.
